# Supplementary material
Source: PubMed Central journal article supplement (PMC4492829)

A

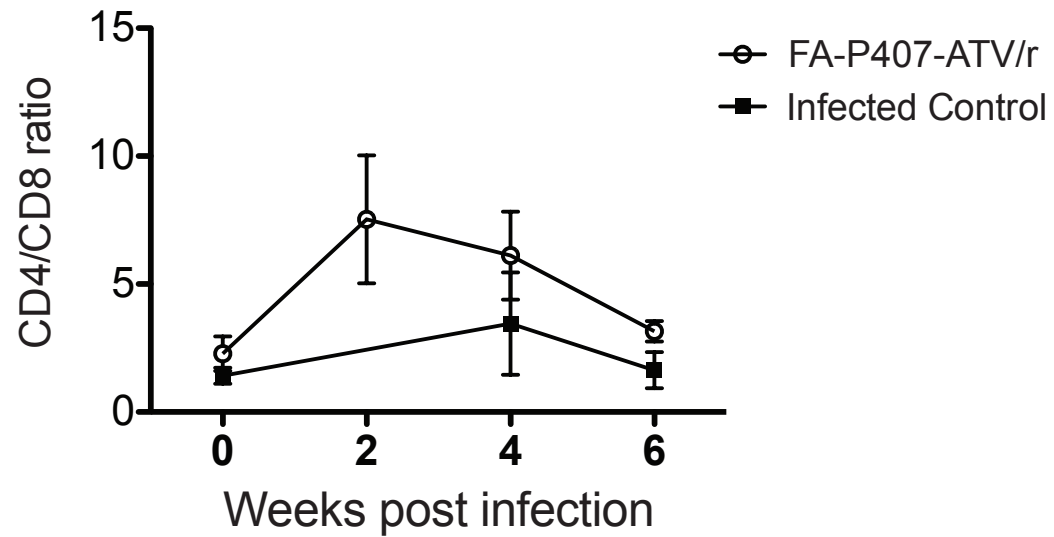

B

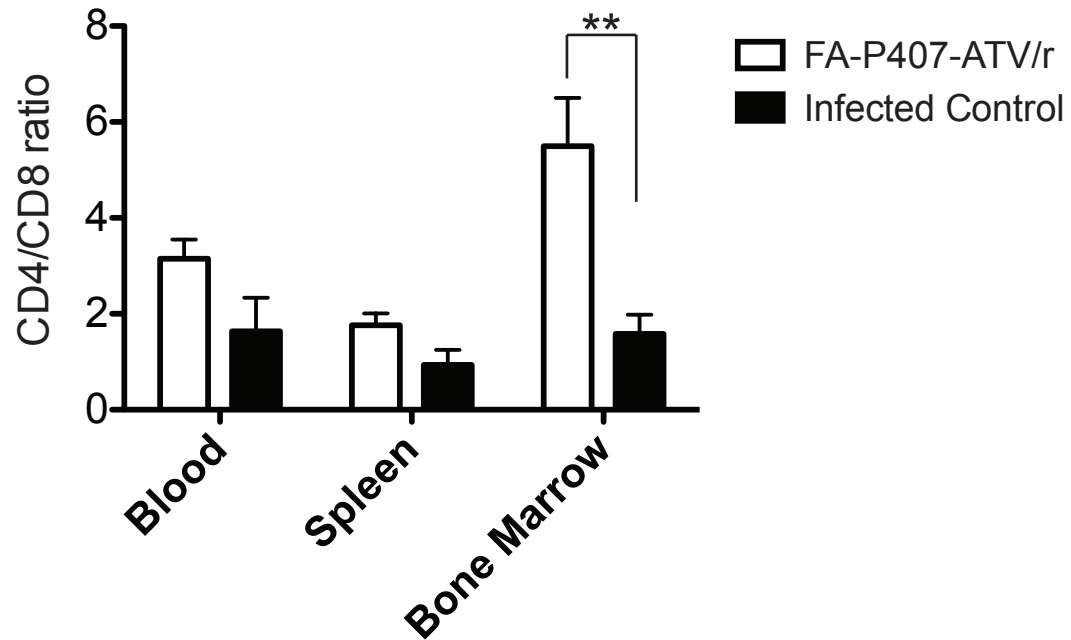

Supplement: NIHMS694921-supplement-1.pdf [file NIHMS694921-supplement-1.pdf]
